# Supplementary figures and images for: Distribution of Killer-Cell Immunoglobulin-Like Receptor Genes and Combinations of Their Human Leucocyte Antigen Ligands in 11 Ethnic Populations in China
Source: MDPI journal article supplement (doi:10.3390/cells8070711), 2019-07-12

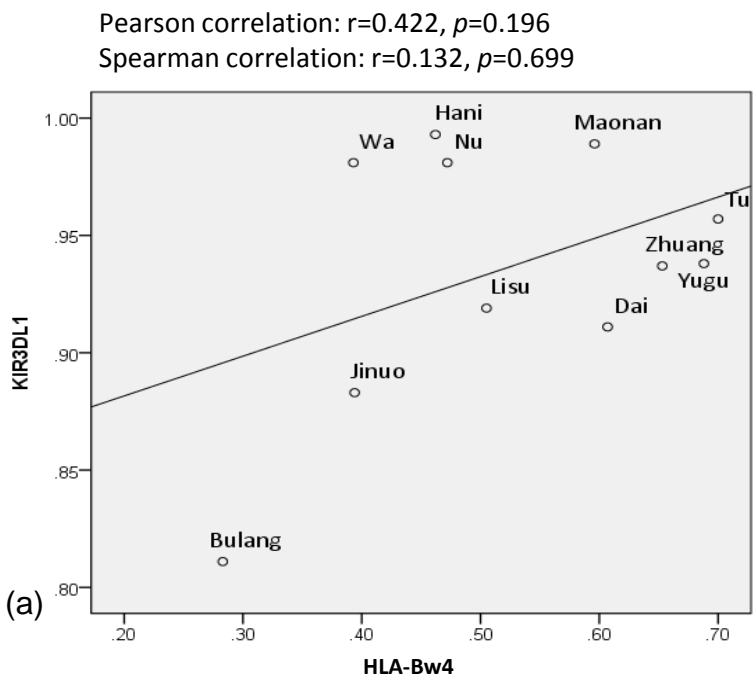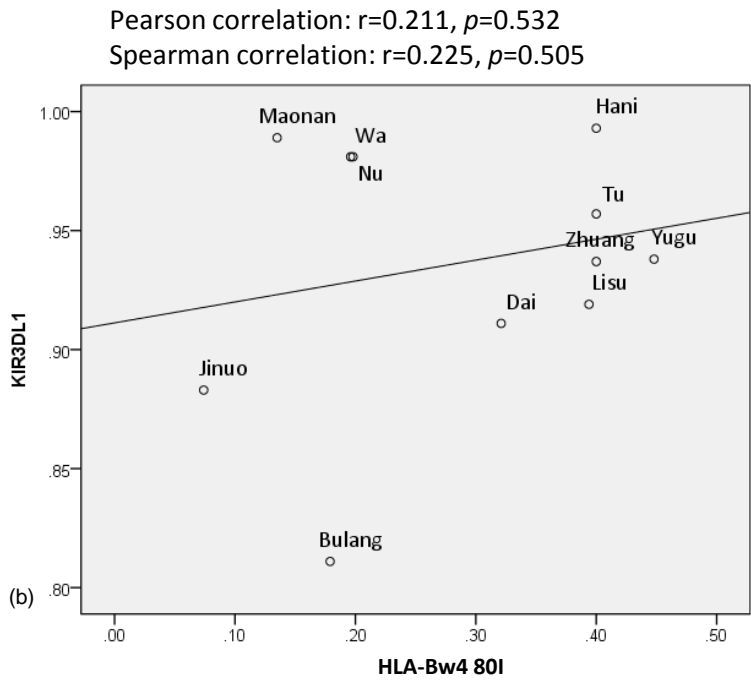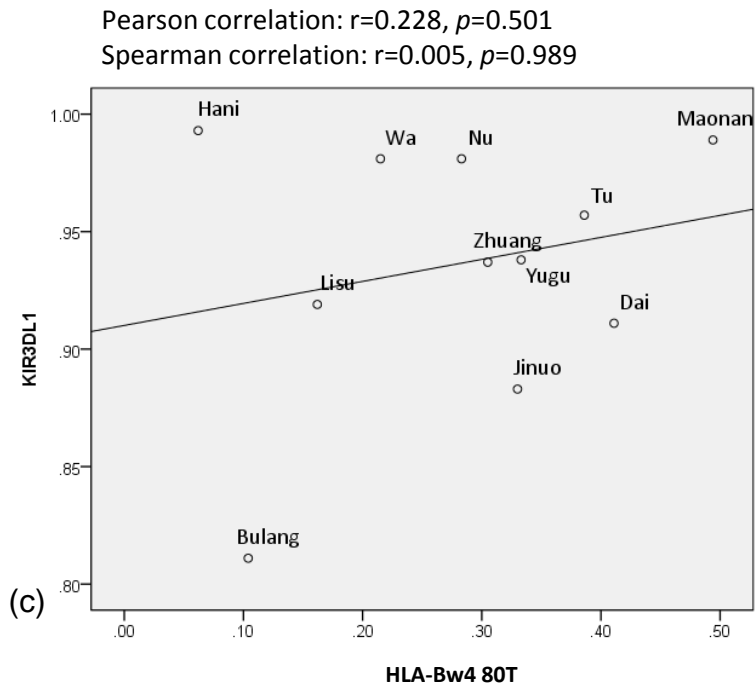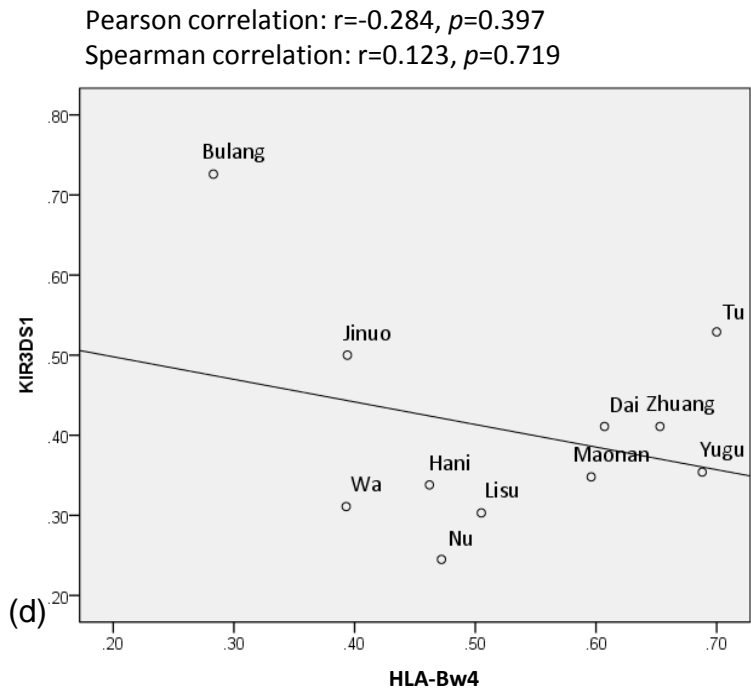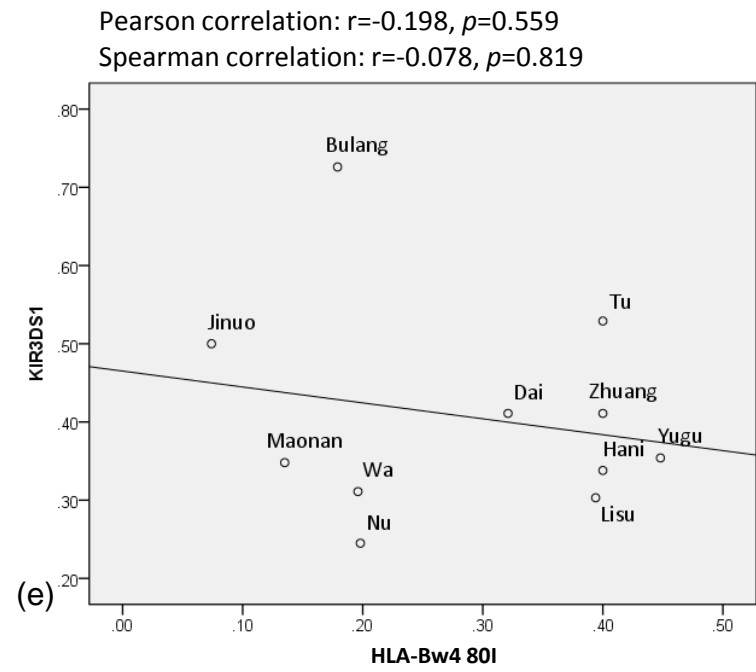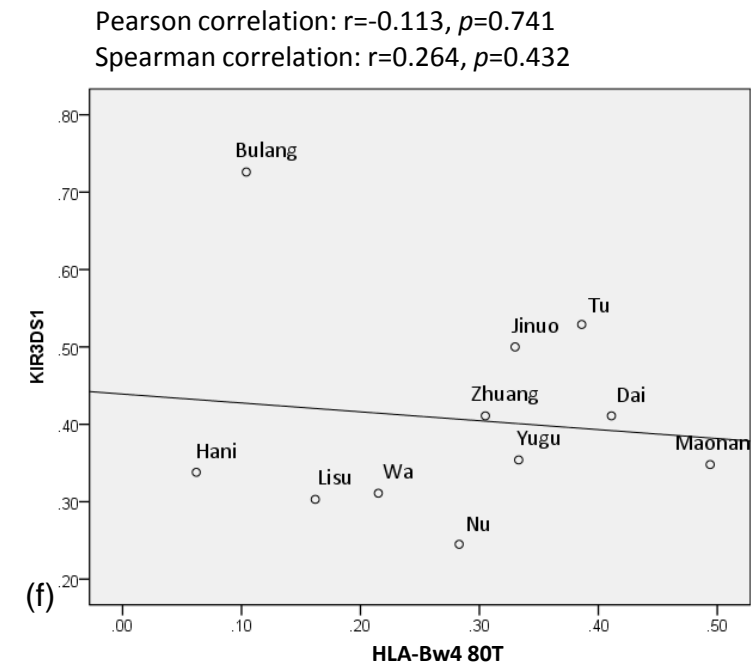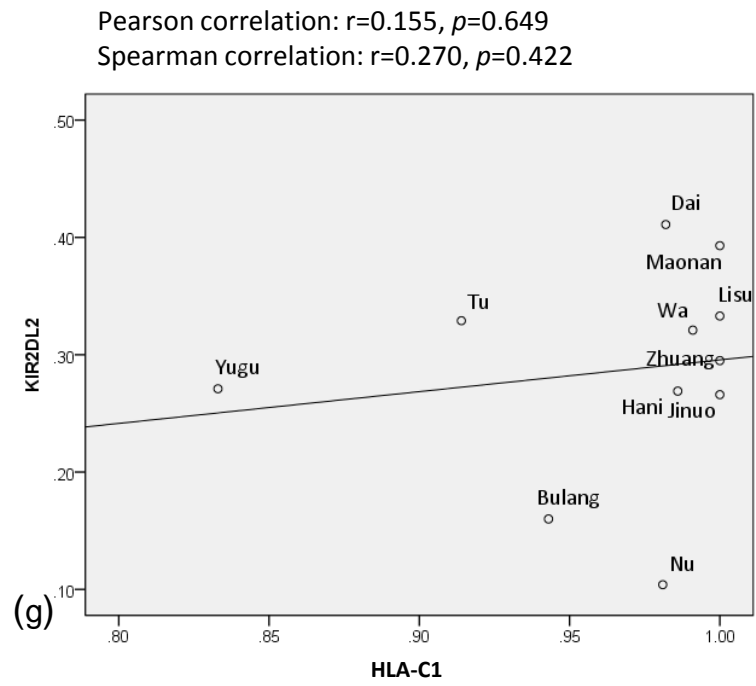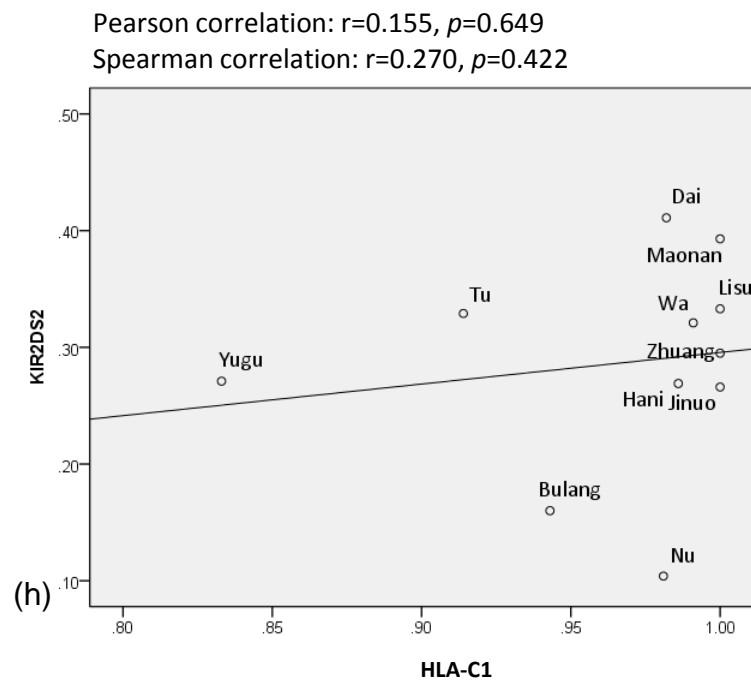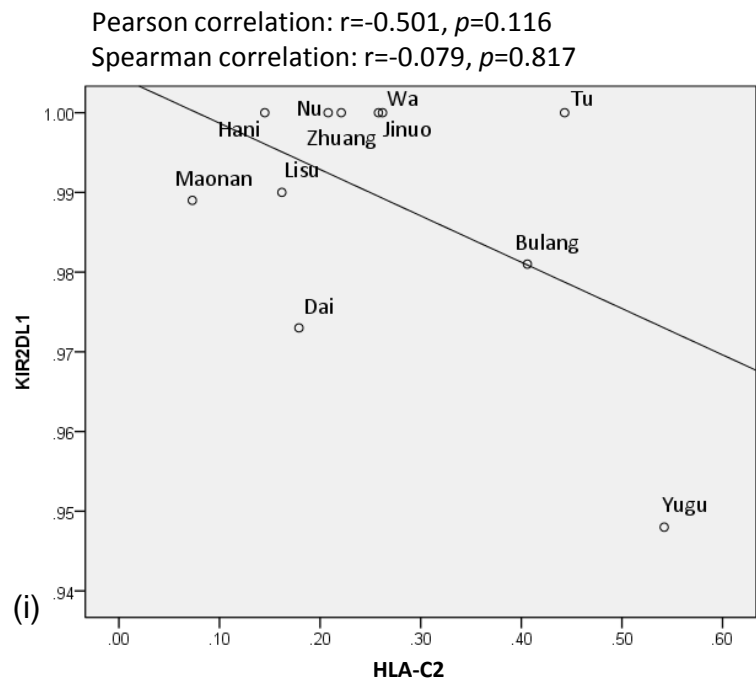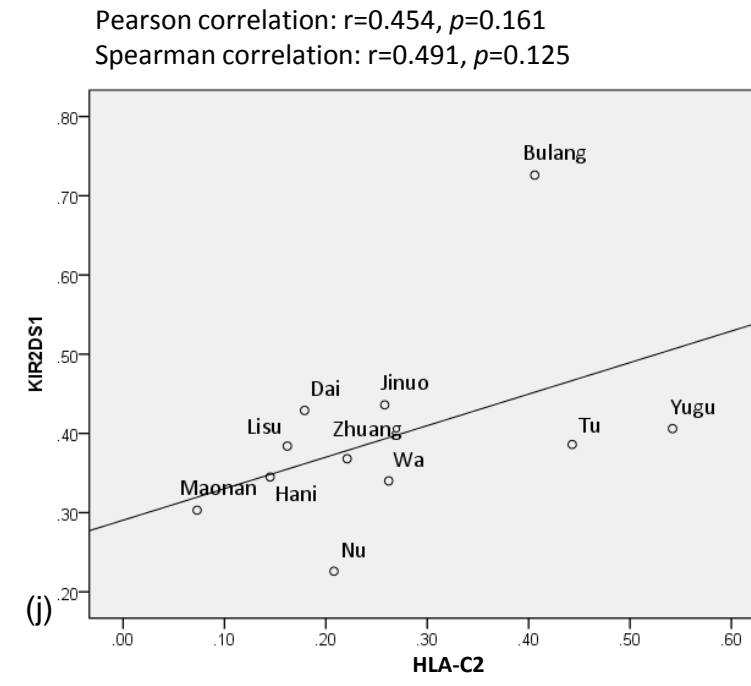

Supplement: s1 [file s1]
